# Supplementary material for: Next-generation sequencing of bile cell-free DNA for the early detection of patients with malignant biliary strictures
Source: HighWire-hosted journal article supplement (doi:10.1136/gutjnl-2021-325178), 2021-07-20
Supplement: gutjnl-2021-325178supp008_data_supplement.pdf [file gutjnl-2021-325178supp008_data_supplement.pdf]

**Supplementary Table S4**

**A**

**List of gene targets in the OncoPrint Comprehensive Assay v3 (COL110993 0120)**

| Hotspot genes |          |        |         | Full-length genes |        |         | Copy number genes |        | Gene fusions (inter- and intragenic) |        |        |
|---------------|----------|--------|---------|-------------------|--------|---------|-------------------|--------|--------------------------------------|--------|--------|
| AKT1          | ESR1     | KIT    | PDGFRB  | ARID1A            | FBXW7  | PTEN    | AKT1              | FGFR4  | AKT2                                 | FGFR2  | NUTM1  |
| AKT2          | EZH2     | KNSTRN | PIK3CB  | ATM               | MLH1   | RAD50   | AKT2              | FLT3   | ALK                                  | FGFR3  | PDGFRA |
| AKT3          | FGFR1    | KRAS   | PIK3CA  | ATR               | MRE11  | RAD51   | AKT3              | IGF1R  | AR                                   | FGR    | PDGFRB |
| ALK           | FGFR2    | MAGOH  | PPP2R1A | ATRX              | MSH6   | RAD51B  | ALK               | KIT    | AXL                                  | FLT3   | PIK3CA |
| AR            | FGFR3    | MAP2K1 | PTPN11  | BAP1              | MSH2   | RAD51C  | AXL               | KRAS   | BRCA1                                | JAK2   | PRKACA |
| ARAF          | FGFR4    | MAP2K2 | RAC1    | BRCA1             | NBN    | RAD51D  | AR                | MDM2   | BRCA2                                | KRAS   | PRKACB |
| AXL           | FLT3     | MAP3K4 | RAF1    | BRCA2             | NF1    | RNF43   | BRAF              | MDM4   | BRAF                                 | MDM4   | PTEN   |
| BRAF          | FOXO2    | MAPK1  | RET     | CDK12             | NF2    | RB1     | CCND1             | MET    | CDKN2A                               | MET    | PPARG  |
| BTK           | GATA2    | MAX    | RHEB    | CDKN1B            | NOTCH1 | SETD2   | CCND2             | MYC    | EGFR                                 | MYB    | RAD51B |
| CBL           | GNAI1    | MDM4   | RHOA    | CDKN2A            | NOTCH2 | SLX4    | CCND3             | MYCL   | ERBB2                                | MYBL1  | RAF1   |
| CCND1         | GNAQ     | MED12  | ROS1    | CDKN2B            | NOTCH3 | SMARCA4 | CCNE1             | MYCN   | ERBB4                                | NF1    | RB1    |
| CDK4          | GNAS     | MET    | SF3B1   | CHEK1             | PALB2  | SMARCB1 | CDK2              | NTRK1  | ERG                                  | NOTCH1 | RELA   |
| CDK6          | H3F3A    | MTOR   | SMAD4   | CREBBP            | PIK3R1 | STK11   | CDK4              | NTRK2  | ESR1                                 | NOTCH4 | RET    |
| CHEK2         | HIST1H3B | MYC    | SMO     | FANCA             | PMS2   | TP53    | CDK6              | NTRK3  | ETV1                                 | NRG1   | ROS1   |
| CSF1R         | HNF1A    | MYCN   | SPOP    | FANCD2            | POLE   | TSC1    | EGFR              | PDGFRA | ETV4                                 | NTRK1  | RSPO2  |
| CTNNB1        | HRAS     | MYD88  | SRC     | FANCI             | PTCH1  | TSC2    | ERBB2             | PDGFRB | ETV5                                 | NTRK2  | RSPO3  |
| DDR2          | IDH1     | NFE2L2 | STAT3   |                   |        |         | ESR1              | PIK3CB | FGFR1                                | NTRK3  | TERT   |
| EGFR          | IDH2     | NRAS   | TERT    |                   |        |         | FGF19             | PIK3CA |                                      |        |        |
| FGFR2         | JAK1     | NTRK1  | TOP1    |                   |        |         | FGF3              | PPARG  |                                      |        |        |
| FGFR3         | JAK2     | NTRK2  | U2AF1   |                   |        |         | FGFR1             | NTRK1  |                                      |        |        |
| FGFR4         | JAK3     | NTRK3  | XPO1    |                   |        |         | FGFR2             | RICTOR |                                      |        |        |
| KDR           |          | PDGFRA |         |                   |        |         | FGFR3             | TERT   |                                      |        |        |

**B**

**List of gene targets in the Pan-Cancer Cell-Free Assay (COL113397 1220)**

| DNA hotspots |       |       |        | Tumor suppressors |       | CNVs  |       | Fusions |       |
|--------------|-------|-------|--------|-------------------|-------|-------|-------|---------|-------|
| AKT1         | EGFR  | FLT3  | KRAS   | PDGFRA            | APC   | CCND1 | ERBB2 | ALK     | FGFR3 |
| ALK          | ERBB2 | GNAI1 | MAP2K1 | PIK3CA            | FBXW7 | CCND2 | FGFR1 | BRAF    | MET   |
| AR           | ERBB3 | GNAQ  | MAP2K2 | RAF1              | PTEN  | CCND3 | FGFR2 | ERG     | NTRK1 |
| ARAF         | ESR1  | GNAS  | MET    | RET               | TP53  | CDK4  | FGFR3 | ETV1    | NTRK3 |
| BRAF         | FGFR1 | HRAS  | MTOR   | ROS1              |       | CDK6  | MET   | FGFR1   | RET   |
| CHEK2        | FGFR2 | IDH1  | NRAS   | SF3B1             |       | EGFR  | MYC   | FGFR2   | ROS1  |
| CTNNB1       | FGFR3 | IDH2  | NTRK1  | SMAD4             |       |       |       |         |       |
| DDR2         | FGFR4 | KIT   | NTRK3  | SMO               |       |       |       |         |       |
