# Supplementary figures and images for: Next-generation sequencing of bile cell-free DNA for the early detection of patients with malignant biliary strictures
Source: HighWire-hosted journal article supplement (doi:10.1136/gutjnl-2021-325178), 2021-07-20

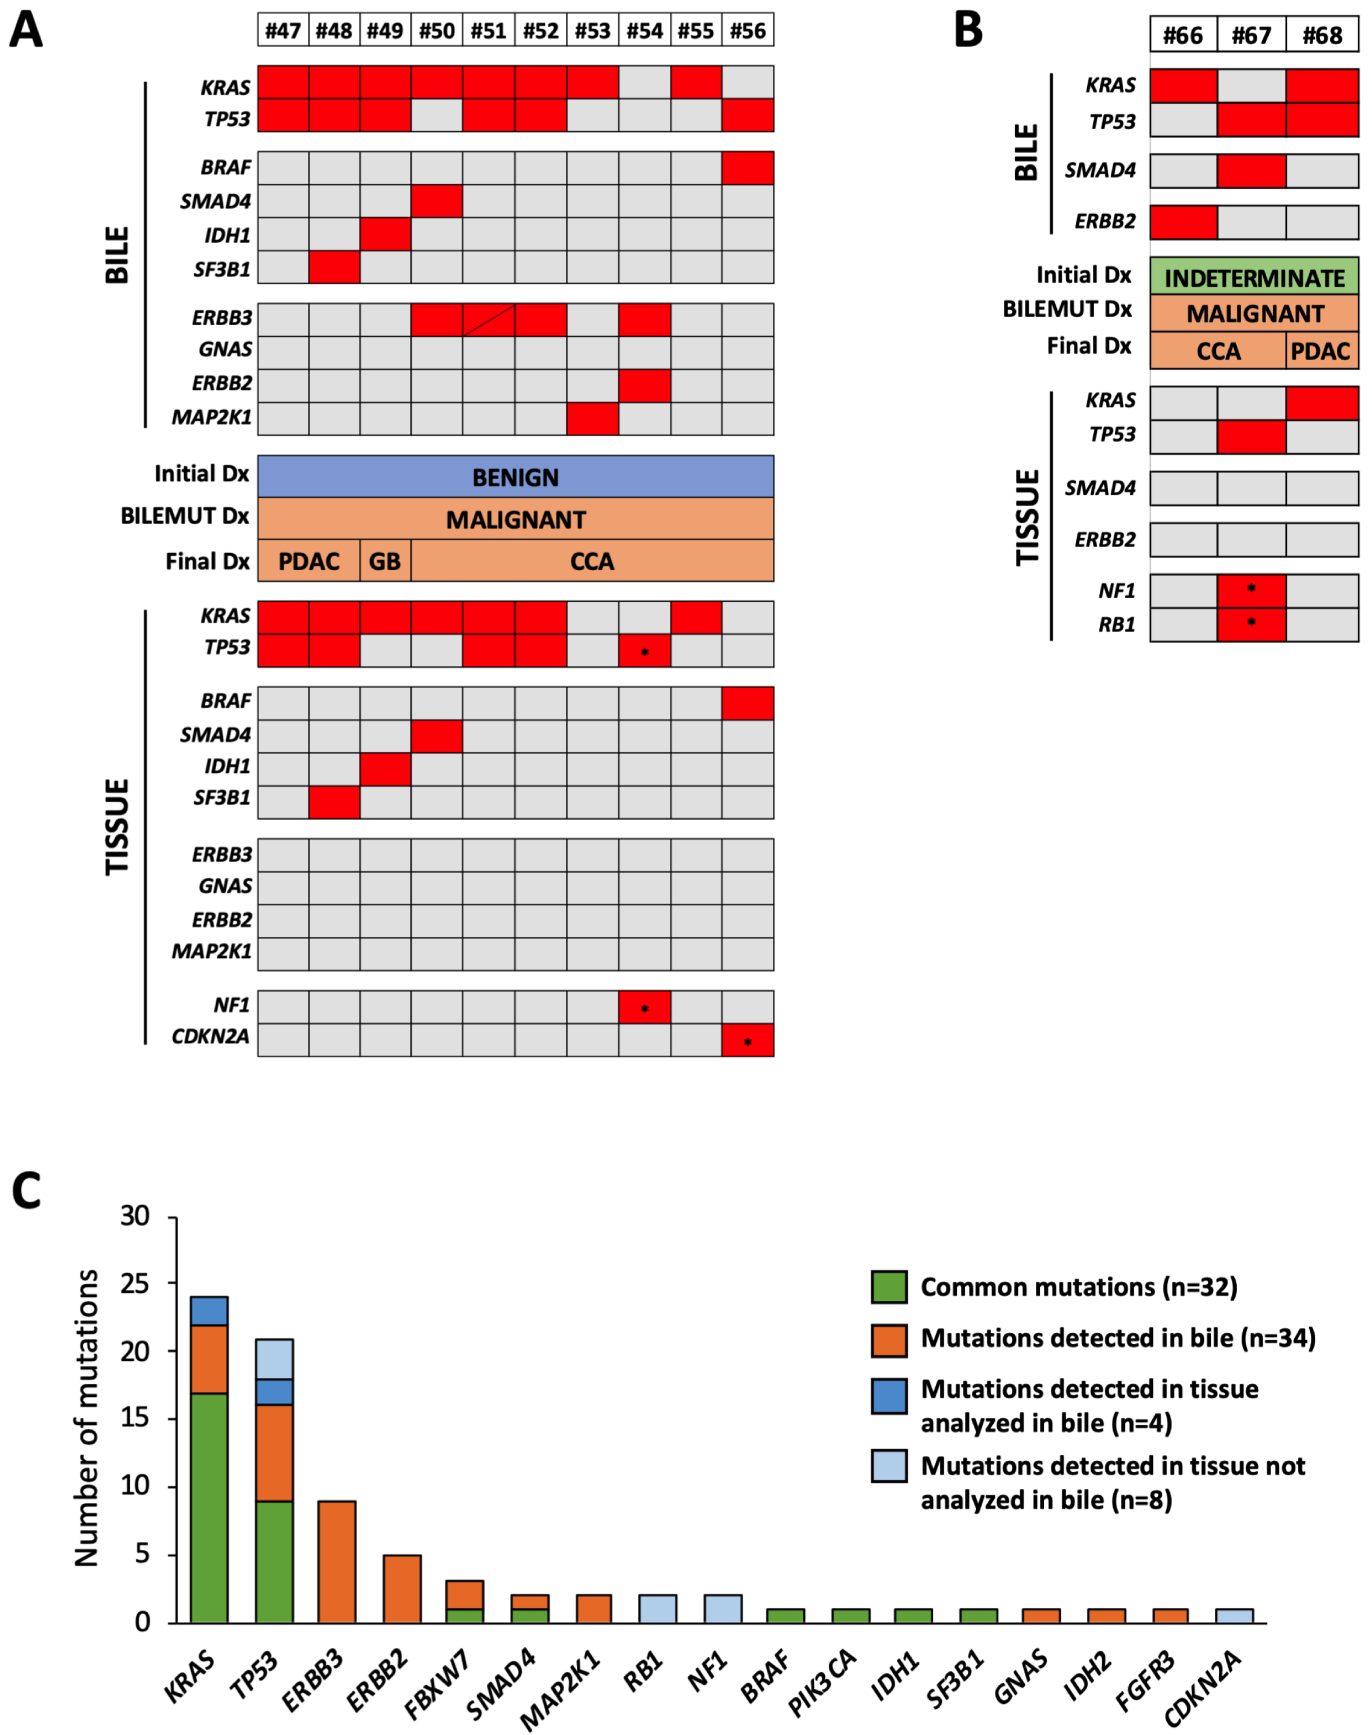

Supplementary Figure S2

Supplement: gutjnl-2021-325178supp004_data_supplement.pdf [file gutjnl-2021-325178supp004_data_supplement.pdf]
